# Supplementary material
Source: Royal Society of Chemistry journal article supplement (doi:10.1039/d5nj04777c)
Supplement: d5nj04777c1.pdf [file d5nj04777c1.pdf]

## Supplementary Data

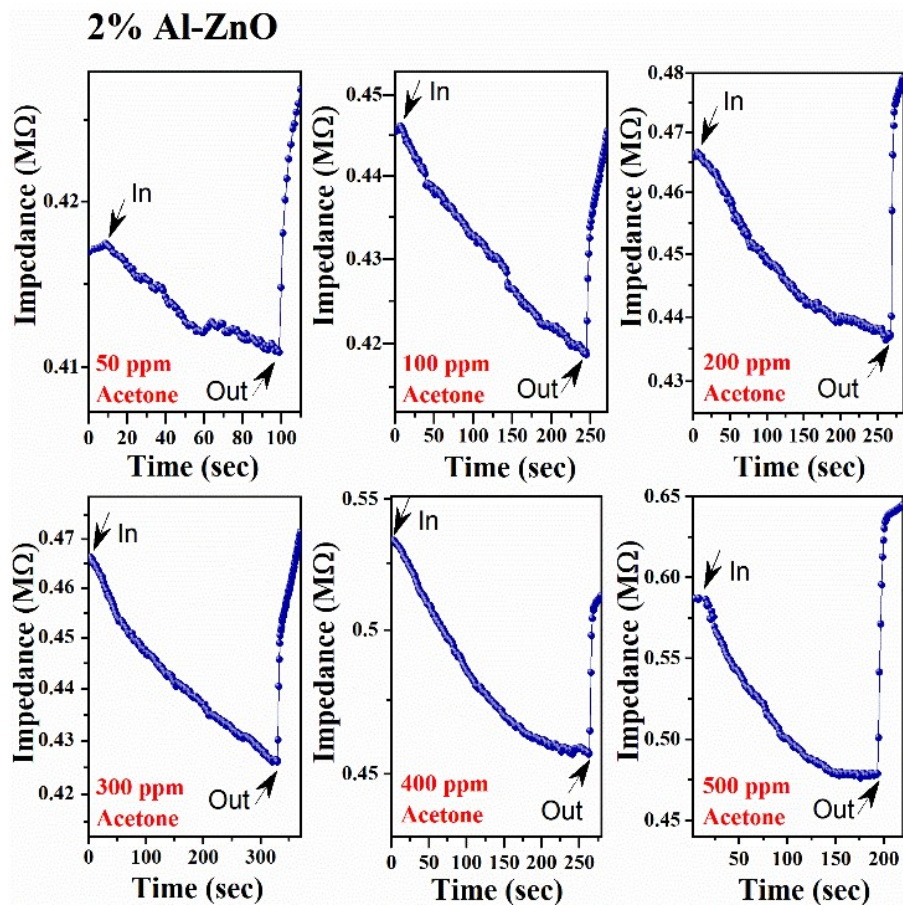

**Fig. S1** Change in the impedance of parent 2% Al-ZnO by exposing the pellet sample in different acetone concentration. 'In' indicate the time of insertion of gas and 'out' shows the time of taking out gas from the chamber.

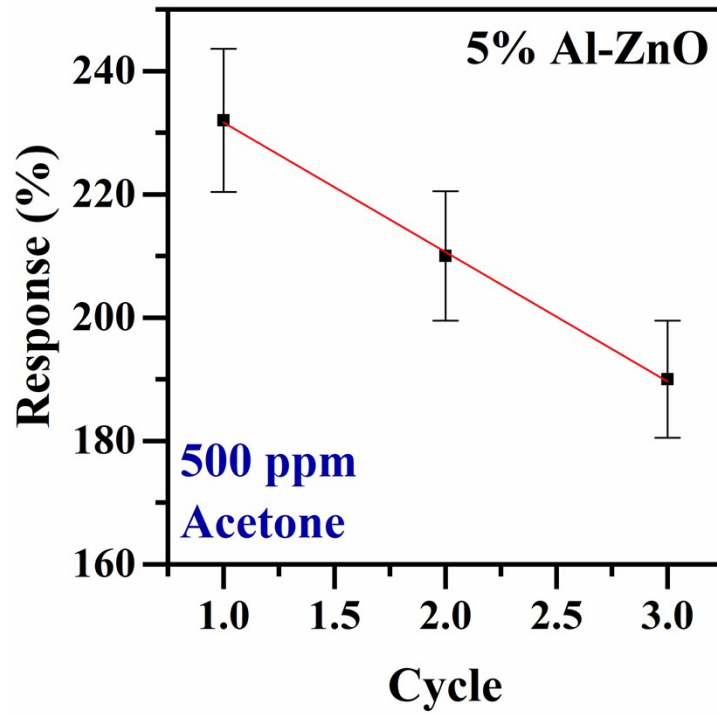

**Fig. S2** Error bar representation of the acetone sensing response 5% Al-ZnO toward 500 ppm over three consecutive cycles ( $\pm 5\%$ )

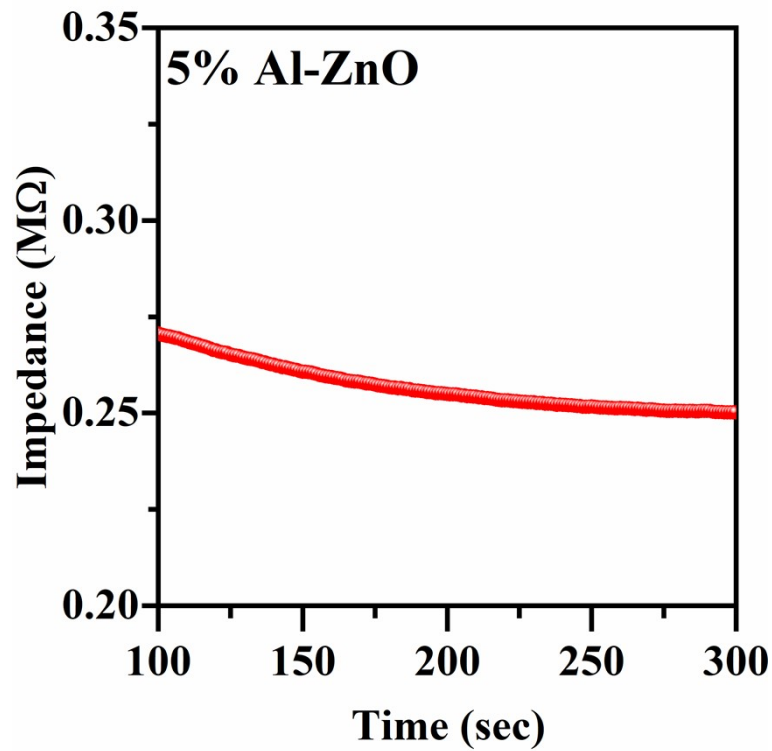

**Fig. S3** Baseline stability plot of 5% Al-ZnO sample at ambient condition.
